# Supplementary material
Source: MDPI journal article supplement (https://www.mdpi.com/2071-1050/16/10/4052)
Supplement: s1 [file s1]

**Optimization of Dissolved Silica Removal from Reverse Osmosis Concentrate by  
*Gedaniella flavovirens* for Enhanced Water Recovery**

Han Gao<sup>1</sup>, Shinya Sato<sup>2</sup>, Hitoshi Kodamatani<sup>3</sup>, Takahiro Fujioka<sup>4</sup>, Kenneth P. Ishida<sup>5</sup>, Keisuke Ikehata<sup>1,\*</sup>

<sup>1</sup> Ingram School of Engineering, Texas State University, San Marcos, TX;  
keehangao@gmail.com

<sup>2</sup> Department of Marine Bioscience, Fukui Prefectural University; ssato@fpu.ac.jp

<sup>3</sup> Graduate School of Science and Engineering, Kagoshima University; kodama@sci.kagoshima-u.ac.jp

<sup>4</sup> Graduate School of Engineering, Nagasaki University; tfujioka@nagasaki-u.ac.jp

<sup>5</sup> Orange County Water District, Fountain Valley, CA; kenishida714@gmail.com

\* Correspondence: kikehata@txstate.edu; Tel.: +1 512-245-0855

**Supplementary Information**

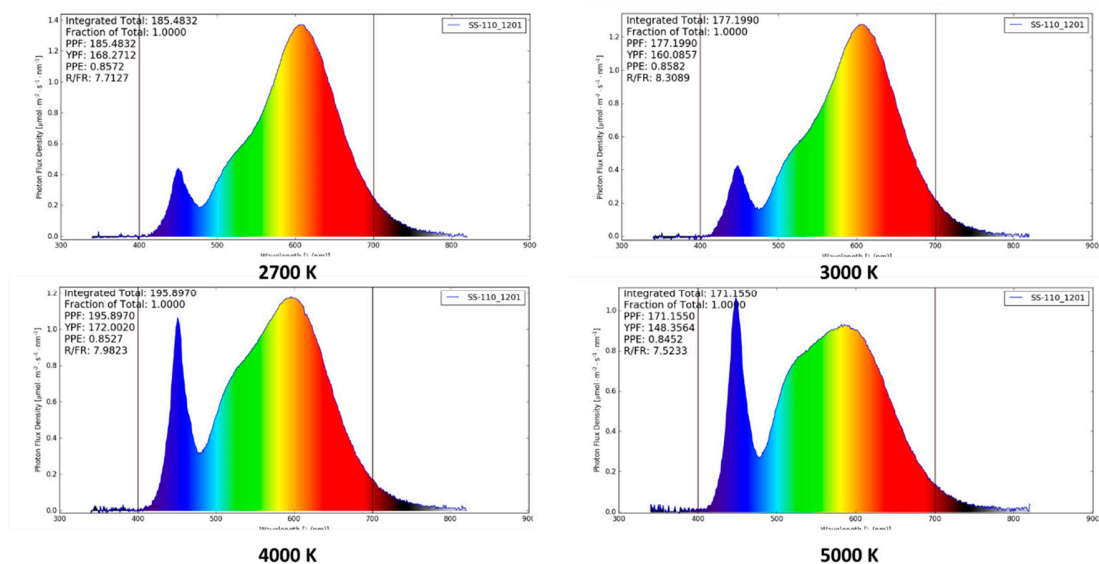

**Figure S1.** Light emission spectra of four white LED bulbs tested in this study.

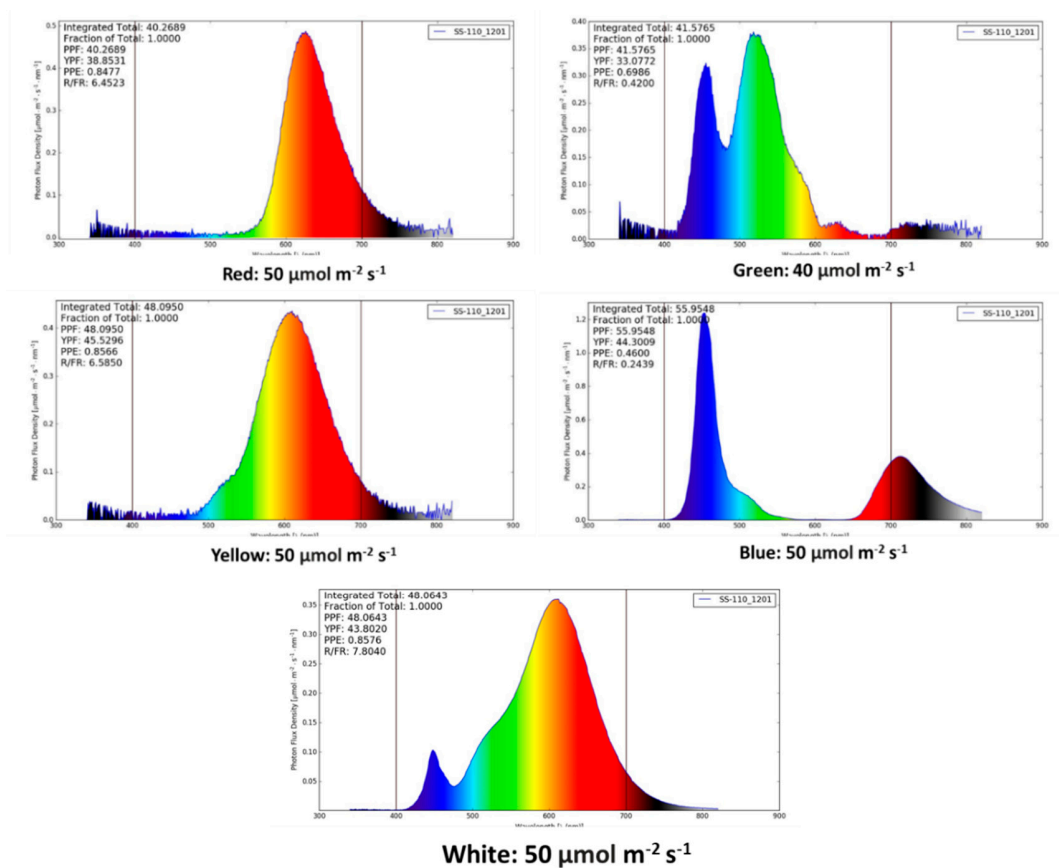

**Figure S2.** Light emission spectra of five colored LED bulbs tested in this study.

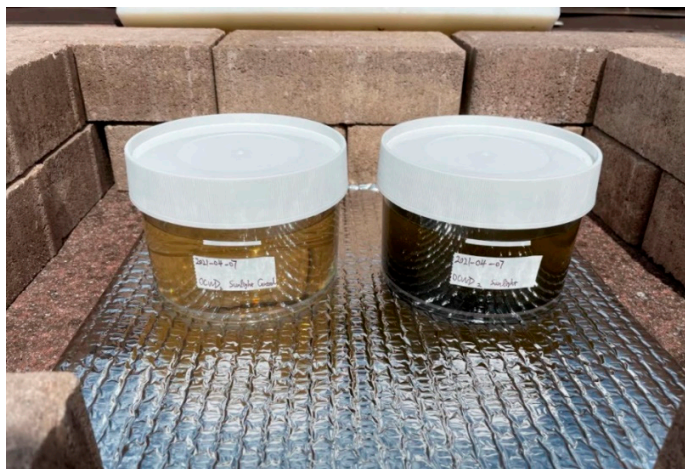

**Figure S3.** Experimental setup – Outdoor experiments.

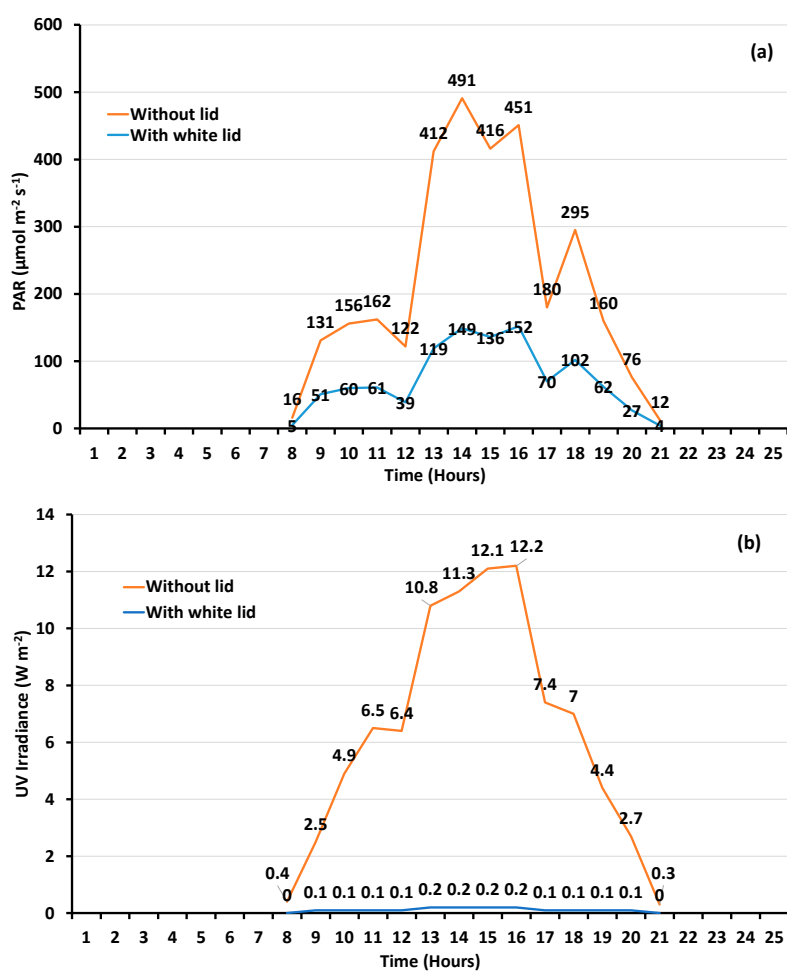

**Figure S4.** Hourly (a) PAR and (b) UV measurements in the 500-mL polycarbonate jars used in the outdoor experiments on May 14, 2021.

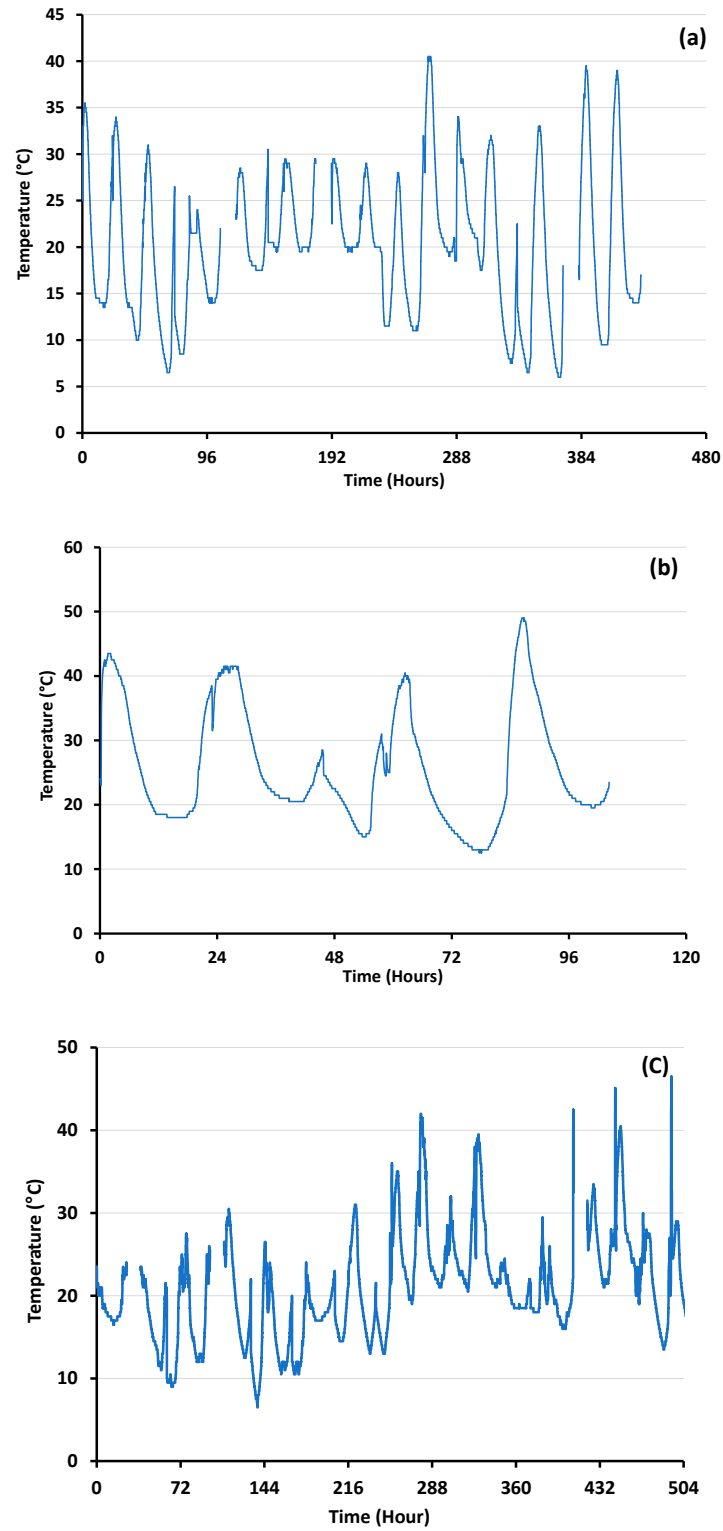

**Figure S5.** Temperature profiles during the outdoor experiment, (a) Run 1, (b) Run 2, and (c) Run 3.

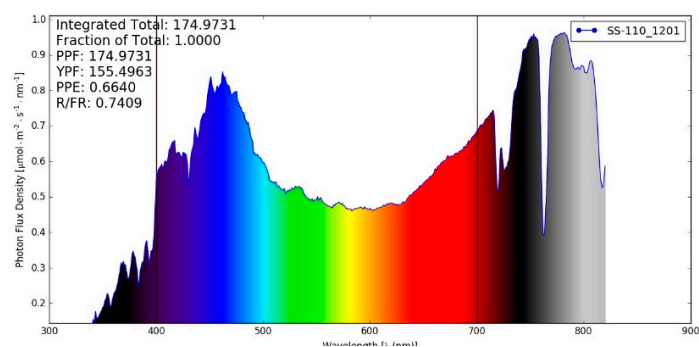

**Figure S6.** Typical light emission spectrum at the outdoor experimental location in the Mid-day (at 2 pm).

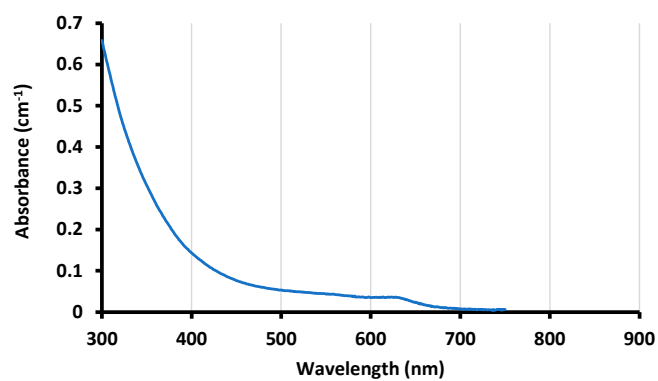

**Figure S7.** UV-vis absorbance spectrum of GWRS ROC.

**Table S1.** LED bulbs used in this study.

| <b>Bulb Type</b>                     | <b>Manufacturer</b> | <b>Product Model #</b> |
|--------------------------------------|---------------------|------------------------|
| Soft White 2,700 K, 800 Lm, 10 W     | GE                  | LED10DA19/827          |
| Soft White 3,000 K, 800 Lm, 10 W     |                     | LED10DA19/830          |
| Cool White 4,000 K, 800 Lm, 10 W     |                     | LED10DA19/840 120      |
| Daylight White 5,000 K, 800 Lm, 10 W |                     | LED10DA19/850          |
| Red 3,000 K, 60 Lm, 8 W              | Philips             | 929001997805           |
| Green 3,000 K, 60 Lm, 8 W            |                     | 929001997905           |
| Yellow 3,000 K, 60 Lm, 8 W           |                     | 929001998105           |
| Blue 3,000 K, 60 Lm, 8 W             |                     | 929001998005           |



**Table S2.** Meteorological data during the outdoor experiment (Run 1).

(Sources: Weather Underground (<https://www.wunderground.com/>) and Time and Date (<https://www.timeanddate.com/>)).

| Date     | Weather        | High (°C) | Ave. (°C) | Low (°C) | Precipitation (Inches) | Sunrise | Sunset  | Daylength (h) |
|----------|----------------|-----------|-----------|----------|------------------------|---------|---------|---------------|
| 03/03/21 | Partly Cloudy  | 22        | 12.3      | 2        | 0                      | 6:55 AM | 6:32 PM | 11:37:30      |
| 03/04/21 | Partly Cloudy  | 25        | 15.9      | 5        | 0                      | 6:53 AM | 6:33 PM | 11:39:17      |
| 03/05/21 | Cloudy         | 27        | 18.4      | 12       | 0                      | 6:52 AM | 6:33 PM | 11:41:04      |
| 03/06/21 | Partly Cloudy  | 20        | 13.7      | 6        | 0                      | 6:51 AM | 6:34 PM | 11:42:52      |
| 03/07/21 | Partly Cloudy  | 21        | 12        | 3        | 0                      | 6:50 AM | 6:35 PM | 11:44:40      |
| 03/08/21 | Mostly Cloudy  | 23        | 15        | 5        | 0                      | 6:49 AM | 6:35 PM | 11:46:28      |
| 03/09/21 | Mostly Cloudy  | 26        | 18.7      | 12       | 0                      | 6:48 AM | 6:36 PM | 11:48:16      |
| 03/10/21 | Mostly Cloudy  | 29        | 21.9      | 18       | 0                      | 6:47 AM | 6:37 PM | 11:50:04      |
| 03/11/21 | Mostly Cloudy  | 27        | 22.9      | 21       | 0                      | 6:45 AM | 6:37 PM | 11:51:53      |
| 03/12/21 | Cloudy         | 28        | 23.4      | 21       | 0                      | 6:44 AM | 6:38 PM | 11:53:41      |
| 03/13/21 | Cloudy / Windy | 26        | 22        | 20       | 0                      | 6:43 AM | 6:39 PM | 11:55:30      |
| 03/14/21 | Light Rain     | 23        | 15.9      | 11       | 4.32                   | 7:42 AM | 7:39 PM | 11:57:19      |
| 03/15/21 | Cloudy         | 30        | 17.3      | 4        | 0.25                   | 7:41 AM | 7:40 PM | 11:59:07      |
| 03/16/21 | Cloudy         | 28        | 22.6      | 19       | 0                      | 7:40 AM | 7:40 PM | 12:00:56      |
| 03/17/21 | Cloudy         | 26        | 21.2      | 13       | 0                      | 7:38 AM | 7:41 PM | 12:02:45      |
| 03/18/21 | Windy          | 23        | 14.7      | 9        | 0                      | 7:37 AM | 7:42 PM | 12:04:34      |
| 03/19/21 | Partly Cloudy  | 22        | 13.7      | 7        | 0                      | 7:36 AM | 7:42 PM | 12:06:23      |
| 03/20/21 | Fair           | 22        | 12.4      | 2        | 0                      | 7:35 AM | 7:43 PM | 12:08:12      |
| 03/21/21 | Cloudy         | 24        | 14.4      | 6        | 0                      | 7:34 AM | 7:44 PM | 12:10:01      |
| 03/22/21 | Cloudy         | 25        | 18.5      | 13       | 0                      | 7:32 AM | 7:44 PM | 12:11:50      |

**Table S3.** Meteorological data during the outdoor experiment (Run 2).

(Sources: Weather Underground (<https://www.wunderground.com/>) and Time and Date (<https://www.timeanddate.com/>)).

| Date     | Weather       | High (°C) | Ave. (°C) | Low (°C) | Precipitation (Inches) | Sunrise | Sunset  | Daylength (h) |
|----------|---------------|-----------|-----------|----------|------------------------|---------|---------|---------------|
| 04/07/21 | Cloudy        | 29        | 21.8      | 10       | 0                      | 7:13 AM | 7:54 PM | 12:40:31      |
| 04/08/21 | Foggy         | 31        | 17.9      | 8        | 0                      | 7:12 AM | 7:54 PM | 12:42:17      |
| 04/09/21 | Partly Cloudy | 31        | 23.8      | 18       | 0                      | 7:11 AM | 7:55 PM | 12:44:02      |
| 04/10/21 | Cloudy/Windy  | 26        | 18.5      | 9        | 0                      | 7:10 AM | 7:56 PM | 12:45:47      |

**Table S4.** Meteorological data during the outdoor experiment (Run 3).

(Sources: Weather Underground (<https://www.wunderground.com/>) and Time and Date (<https://www.timeanddate.com/>)).

| Date     | Cycle | Weather       | High (°C) | Ave. (°C) | Low (°C) | Precipitation (Inches) | Sunrise | Sunset  | Daylength (h) |
|----------|-------|---------------|-----------|-----------|----------|------------------------|---------|---------|---------------|
| 04/15/21 | 1     | Cloudy        | 21        | 17.8      | 16       | 0                      | 7:04 AM | 7:59 PM | 12:54:25      |
| 04/16/21 |       | Light Rain    | 20        | 17.2      | 15       | 4.06                   | 7:03 AM | 7:59 PM | 12:56:07      |
| 04/17/21 |       | Cloudy        | 18        | 13.5      | 11       | 1.02                   | 7:02 AM | 8:00 pm | 12:57:49      |
| 04/18/21 |       | Mostly Cloudy | 19        | 13.2      | 9        | 0                      | 7:01 AM | 8:00 PM | 12:59:30      |
| 04/19/21 |       | Mostly Cloudy | 23        | 15.2      | 6        | 0                      | 7:00 AM | 8:01 PM | 13:01:11      |
| 04/20/21 |       | Fair/Cloudy   | 28        | 16.6      | 7        | 0                      | 6:59 AM | 8:02 PM | 13:02:50      |
| 04/21/21 |       | Mostly Cloudy | 17        | 11.5      | 6        | 0                      | 6:58 AM | 8:02 PM | 13:04:30      |
| 04/22/21 |       | Cloudy        | 18        | 14        | 4        | 0                      | 6:57 AM | 8:03 PM | 13:06:08      |
| 04/23/21 |       | Cloudy/Foggy  | 22        | 18.9      | 16       | 0                      | 6:56 AM | 8:04 PM | 13:07:46      |
| 04/24/21 |       | Fair          | 28        | 20.7      | 14       | 14.22                  | 6:55 AM | 8:04 PM | 13:09:24      |
| 04/25/21 | 2     | Cloudy        | 29        | 20.6      | 9        | 0                      | 6:54 AM | 8:05 PM | 13:11:00      |
| 04/26/21 |       | Mostly Cloudy | 29        | 22.2      | 18       | 0                      | 6:53 AM | 8:06 PM | 13:12:36      |
| 04/27/21 |       | Cloudy        | 26        | 22.9      | 21       | 0                      | 6:52 AM | 8:06 PM | 13:14:11      |
| 04/28/21 |       | Cloudy        | 29        | 25        | 22       | 0                      | 6:51 AM | 8:07 PM | 13:15:45      |
| 04/29/21 |       | Light Rain    | 24        | 21.5      | 19       | 2.79                   | 6:50 AM | 8:07 PM | 13:17:18      |
| 04/30/21 | 3     | Cloudy        | 22        | 19.7      | 18       | 1.52                   | 6:49 AM | 8:08 PM | 13:18:51      |
| 05/01/21 |       | Storm         | 22        | 19.5      | 18       | 50.55                  | 6:48 AM | 8:09 PM | 13:20:22      |
| 05/02/21 |       | Cloudy/Foggy  | 30        | 21.6      | 14       | 35.81                  | 6:47 AM | 8:09 PM | 13:21:53      |
| 05/03/21 |       | Cloudy        | 33        | 25.2      | 21       | 0                      | 6:47 AM | 8:10 PM | 13:23:22      |
| 05/04/21 |       | Mostly Cloudy | 26        | 22.2      | 17       | 0                      | 6:46 AM | 8:11 PM | 13:24:51      |
| 05/05/21 |       | Fair          | 25        | 18.6      | 12       | 6.35                   | 6:45 AM | 8:11 PM | 13:26:18      |
| 05/06/21 |       | Fair          | 29        | 19.9      | 11       | 0                      | 6:44 AM | 8:12 PM | 13:27:45      |

**Table S5.** Daily PAR and UV measurements during the outdoor experiment (Run 1).

| Date     | Time     | PAR without Lid<br>( $\mu\text{mol m}^{-2} \text{s}^{-1}$ ) | PAR with Lid<br>( $\mu\text{mol m}^{-2} \text{s}^{-1}$ ) | UV without Lid (W m <sup>-2</sup> ) | UV with Lid (W m <sup>-2</sup> ) |
|----------|----------|-------------------------------------------------------------|----------------------------------------------------------|-------------------------------------|----------------------------------|
| 03/06/21 | 2:00 PM  | 1,840                                                       | 1,800                                                    | 42.4                                | 6.9                              |
| 03/07/21 | 1:00 PM  | 1,792                                                       | 1,760                                                    | 41.1                                | 6.7                              |
| 03/08/21 | 3:30 PM  | 470                                                         | 408                                                      | 13.1                                | 1.9                              |
| 03/09/21 | 11:30 AM | 648                                                         | 117                                                      | 24.8                                | 0.4                              |
| 03/10/21 | 1:00 PM  | 2,069                                                       | 354                                                      | 19.6                                | 0.5                              |
| 03/11/21 | 12:30 PM | 1,101                                                       | 184                                                      | 28.4                                | 0.4                              |
| 03/12/21 | 1:00 PM  | 367                                                         | 66                                                       | 8                                   | 0.6                              |
| 03/13/21 | 11:30 AM | 362                                                         | 54                                                       | 7.8                                 | 0.1                              |
| 03/15/21 | 12:30 PM | 1,795                                                       | 264                                                      | 44.4                                | 0.7                              |
| 03/16/21 | 11:30 AM | 290                                                         | 45                                                       | 8.1                                 | 0.1                              |
| 03/18/21 | 12:00 PM | 1,746                                                       | 295                                                      | 41.5                                | 0.5                              |
| 03/20/21 | 11:30 AM | 1,490                                                       | 225                                                      | 34.1                                | 0.6                              |
| 03/22/21 | 11:00 AM | 176                                                         | 29                                                       | 4.8                                 | 0.1                              |

**Table S6.** Daily PAR and UV measurements during the outdoor experiment (Run 2).

| Date     | Time     | PAR without Lid<br>( $\mu\text{mol m}^{-2} \text{s}^{-1}$ ) | PAR with Lid<br>( $\mu\text{mol m}^{-2} \text{s}^{-1}$ ) | UV without Lid (W m <sup>-2</sup> ) | UV with Lid (W m <sup>-2</sup> ) |
|----------|----------|-------------------------------------------------------------|----------------------------------------------------------|-------------------------------------|----------------------------------|
| 04/08/21 | 1:00 PM  | 2,045                                                       | 624                                                      | 50.9                                | 1.5                              |
| 04/09/21 | 12:00 PM | 702                                                         | 213                                                      | 20.1                                | 0.6                              |

**Table S7.** Daily PAR and UV measurements during the outdoor experiment (Run 3).

| Date     | Time     | Cycle | PAR without Lid<br>( $\mu\text{mol m}^{-2} \text{s}^{-1}$ ) | PAR with Lid<br>( $\mu\text{mol m}^{-2} \text{s}^{-1}$ ) | UV without Lid<br>( $\text{W m}^{-2}$ ) | UV with Lid<br>( $\text{W m}^{-2}$ ) |
|----------|----------|-------|-------------------------------------------------------------|----------------------------------------------------------|-----------------------------------------|--------------------------------------|
| 04/16/21 | 1:30 PM  | 1     | 104                                                         | 31                                                       | 2.9                                     | 0.1                                  |
| 04/17/21 | 12:00 PM |       | 390                                                         | 139                                                      | 10.7                                    | 0.5                                  |
| 04/18/21 | 12:30 PM |       | 331                                                         | 105                                                      | 8.6                                     | 0.2                                  |
| 04/19/21 | 1:00 PM  |       | 221                                                         | 80                                                       | 8.6                                     | 0.2                                  |
| 04/20/21 | 12:30 PM |       | 78                                                          | 24                                                       | 6.2                                     | 0.2                                  |
| 04/21/21 | 12:30 PM |       | 354                                                         | 111                                                      | 11.9                                    | 0.4                                  |
| 04/22/21 | 11:30 AM |       | 164                                                         | 53                                                       | 4.4                                     | 0.1                                  |
| 04/23/21 | 12:30 PM |       | 88                                                          | 25                                                       | 2.2                                     | 0.1                                  |
| 04/24/21 | 12:00 PM |       | 66                                                          | 22                                                       | 5.4                                     | 0.2                                  |
| 04/25/21 | 11:30 AM |       | 68                                                          | 23                                                       | 5.5                                     | 0.2                                  |
| 04/26/21 | 1:00 PM  | 2     | 652                                                         | 184                                                      | 21.6                                    | 0.5                                  |
| 04/27/21 | 12:00 PM |       | 149                                                         | 47                                                       | 4.5                                     | 0.1                                  |
| 04/28/21 | 1:00 PM  |       | 262                                                         | 84                                                       | 8.9                                     | 0.3                                  |
| 04/29/21 | 10:30 AM |       | 40                                                          | 13                                                       | 1.4                                     | 0.1                                  |
| 04/30/21 | 12:30 PM |       | 80                                                          | 24                                                       | 2.1                                     | 0.1                                  |
| 05/01/21 | 12:30 PM | 3     | 76                                                          | 22                                                       | 1.9                                     | 0.1                                  |
| 05/02/21 | 1:00 PM  |       | 2,033                                                       | 517                                                      | 50.2                                    | 0.9                                  |
| 05/03/21 | 1:00 PM  |       | 1,971                                                       | 606                                                      | 45.8                                    | 0.9                                  |
| 05/04/21 | 11:30 AM |       | 160                                                         | 49                                                       | 8.2                                     | 0.2                                  |
| 05/05/21 | 10:30 AM |       | 59                                                          | 16                                                       | 5.3                                     | 0.1                                  |
| 05/06/21 | 12:00 PM |       | 76                                                          | 25                                                       | 5.2                                     | 0.1                                  |
